# Supplementary material for: Improvement in the quality of black phosphorus by selecting a mineralizer
Source: Royal Society of Chemistry journal article supplement (doi:10.1039/c9nr06583k), 2019-01-01
Supplement: c9nr06583k1.pdf [file c9nr06583k1.pdf]

## Supporting information

### Improve the Quality of Black Phosphorus by Selecting Mineralizer

Ying Yu<sup>1</sup>, Boran Xing<sup>1</sup>, Dan Wang<sup>1</sup>, Liao Guan<sup>1</sup>, Xinyue Niu<sup>1</sup>, Jiadong Yao<sup>1</sup>, Xiaoyuan Yan<sup>1</sup>,

Shucheng Zhang<sup>1</sup>, Yali Liu<sup>1</sup>, Xiaoxiang Wu<sup>1</sup>, Jian Sha<sup>1</sup> and Yewu Wang<sup>1,2\*</sup>

<sup>1</sup>Department of Physics, Zhejiang Province Key Laboratory of Quantum Technology and Devices & State Key Laboratory of Silicon Materials, Zhejiang University, Hangzhou 310027, P. R. China.

<sup>2</sup>Collaborative Innovation Centre of Advanced Microstructures, Nanjing University, Nanjing 210093, P. R. China

\*Corresponding author: [yewuwang@zju.edu.cn](mailto:yewuwang@zju.edu.cn).

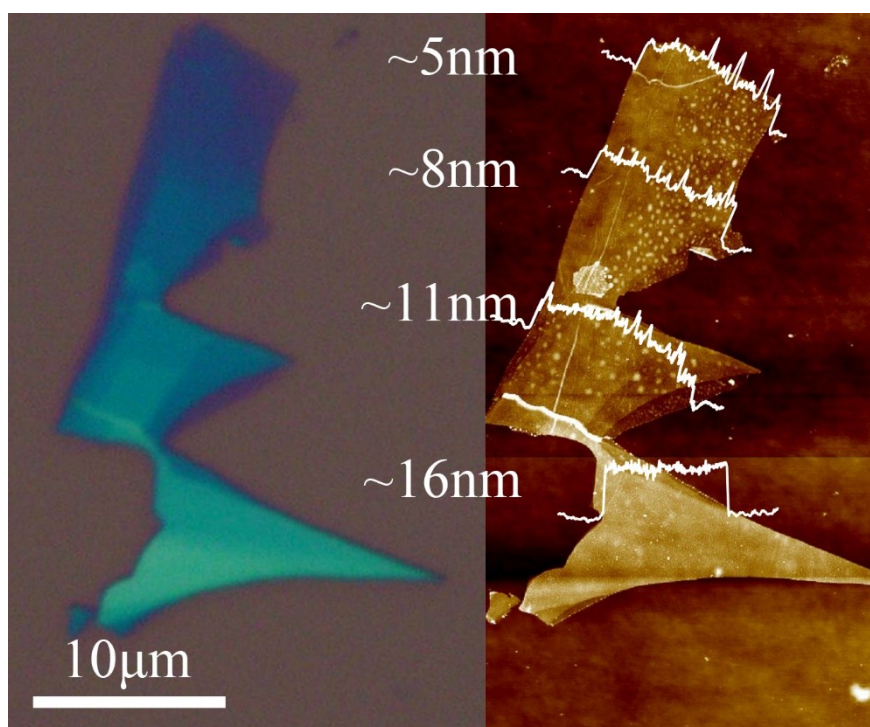

**Figure S1.** OM and AFM calibration of BP flakes with multiple thickness gradients. On the left is a BP flakes on the substrate (300 nm SiO<sub>2</sub>/Si), and on the right is an AFM image, and the thickness is calibrated. In comparison, BP gradually changed from a light blue of 16 nm to a deep purple of 5 nm. The color represented by the thickness of about 10 nm is dark blue, which is the thickness of the device we prepared.

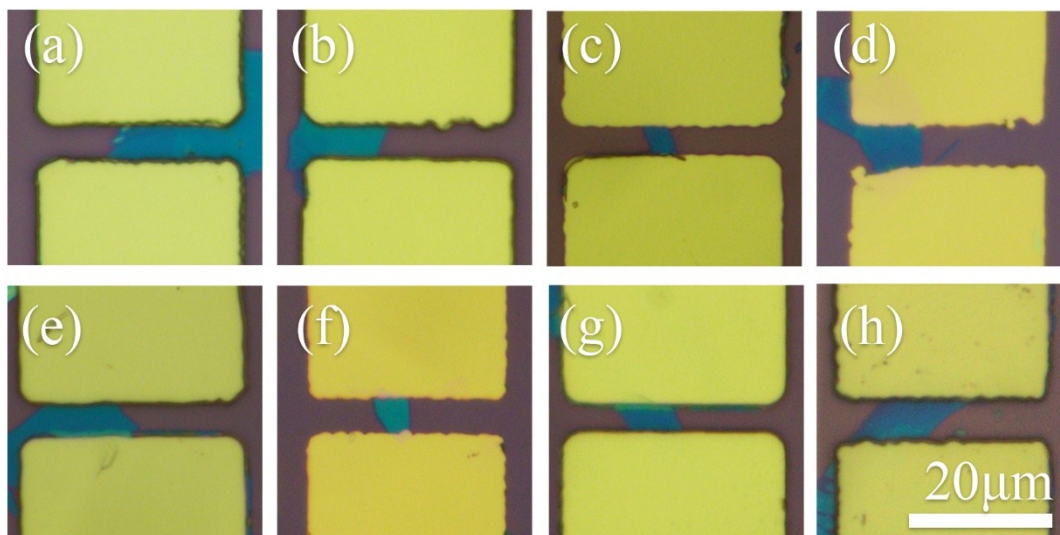

**Figure S2.** Optical photos of devices. (a-d) Devices based on Sn-BP. (e-h) Devices based on Pb-BP.
